# Supplementary material
Source: PubMed Central journal article supplement (PMC2512261)

**Supplemental Figure 1. FIX carboxylation is similar over a range of vitamin K concentrations.** Low-producing fIX BHK cells were radiolabeled (10 min) in media containing <sup>35</sup>Met/Cys and varying amounts of vitamin K (2-50 μM). Cell lysates were then immunoprecipitated with saturating amounts of anti-fIX antibody and subjected to SDS-PAGE and PhosphorImager analysis.

**Supplemental Figure 2. r-VKORC1 expression in fIX BHK cell lines.** Cell lysates prepared from BHK (lane 1) or fIX BHK cells (lane 2) expressing low (A) or high (B) levels of fIX or also expressing r-VKORC1 (lanes 3 and 4, which represent two different clonal isolates) were analyzed in a western using anti-C-terminal VKORC1 antibody.

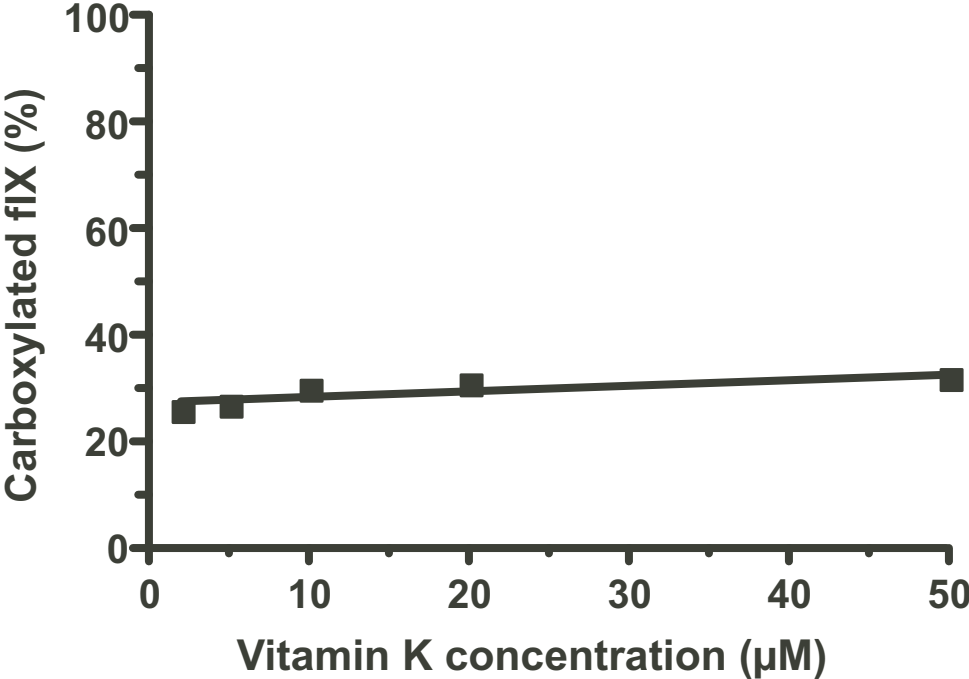

**A.**

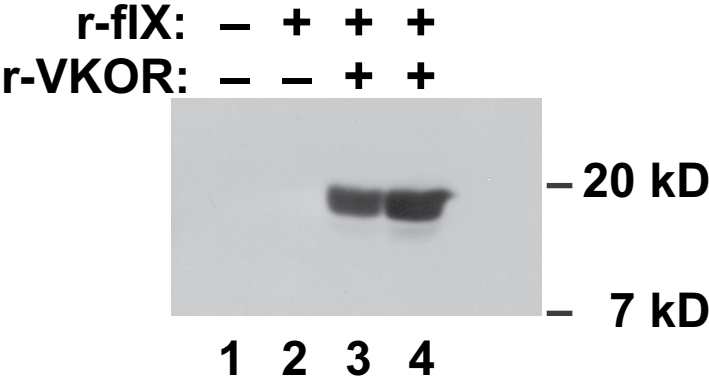

**B.**

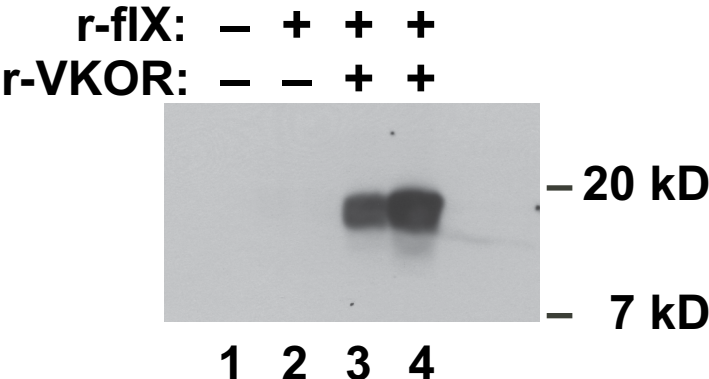

Supplement: NIHMS60987-supplement-si20060110_045.pdf [file NIHMS60987-supplement-si20060110_045.pdf]
